# Supplementary material
Source: PubMed Central journal article supplement (PMC2801238)
Supplement: supp_M109.057810_jbc.M109.057810-1.pdf [file supp_M109.057810_jbc.M109.057810-1.pdf]

## Supplemental data

### Supplemental Figure 1.

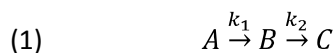

$$(2) \quad \frac{d[A]}{dt} = -k_1[A], \frac{d[B]}{dt} = k_1[A] - k_2[B], \frac{d[C]}{dt} = k_2[B]$$

$$(3) \quad A(t) = A_0 e^{-k_1 t}, B(t) = \frac{A_0 k_1}{k_2 - k_1} (e^{-k_1 t} - e^{-k_2 t}), C(t) = \frac{A_0}{k_2 - k_1} (k_1 e^{-k_2 t} - k_2 e^{-k_1 t} + k_2 - k_1)$$

$$(4) \quad \alpha(t) = A_0 \left[ \alpha_C + \frac{(\alpha_A(k_2 - k_1) + \alpha_B k_2 - \alpha_C k_2)}{k_2 - k_1} e^{-k_1 t} + \frac{k_1(\alpha_B - \alpha_C)}{k_2 - k_1} e^{-k_2 t} \right]$$

Supplemental Figure 1. To fit the kinetic data we adopted a model consisting of two, sequential reaction steps (1) where, for example, A represents the 4Fe-4S cluster, B represents the 3Fe-4S, and C represents the 2Fe-2S. If we assume these reactions proceed via mass-action kinetics then this model can be equivalently described as a sequence of differential equation for the concentrations of the chemicals (2) where it is the concentration of the intermediate [B] that is of primary interest. Under these assumptions the rate constants,  $k_1$  and  $k_2$ , may be also be termed rates as they have the units of  $\text{time}^{-1}$ . This system of equations has the useful property of being exactly solvable, so that we can determine  $A(t)$ ,  $B(t)$  and  $C(t)$ , given the initial conditions  $[A](t=0) = A_0$ ,  $[B](t=0) = 0$ ,  $[C](t=0) = 0$  as shown in (3). To fit this equation to the data we require the absorbance,  $\alpha$ , as a function of time. Denoting the absorbance of substance A as  $\alpha_A$  and so forth, the equation for the absorbance at time  $t$  is given by (4). We can experimentally determine  $A_0$  and the absorbances  $\alpha_A$  and  $\alpha_C$  can be determined in the limits  $t \rightarrow 0$  and  $t \rightarrow \infty$ , respectively. This exact form can then be fitted to the data using a standard non-linear least square fit implemented, in this case using the R routine `nls`, to provide fitted values for  $k_1$ ,  $k_2$  and  $\alpha_B$ .

**Supplemental Figure 2.**

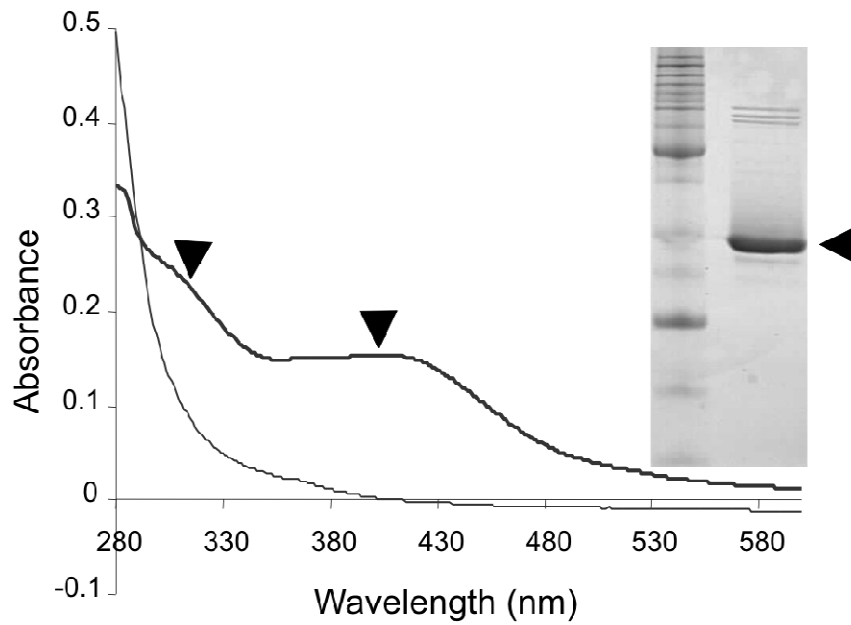

Supplemental Figure 2. UV/visible spectra of NmFNR. Spectra of NmFNR prepared with incorporated cofactor (thick line) and apo-NmFNR (thin line) are shown. The peak at 405 nm and the shoulder around 310 nm are marked with arrowheads. Inset shows a gel with purified NmFNR (right hand lane, arrowhead marks major band at 28 kDa) and molecular weight standards (Benchmark™, Invitrogen, left hand lane).

**Supplemental Figure 3.**

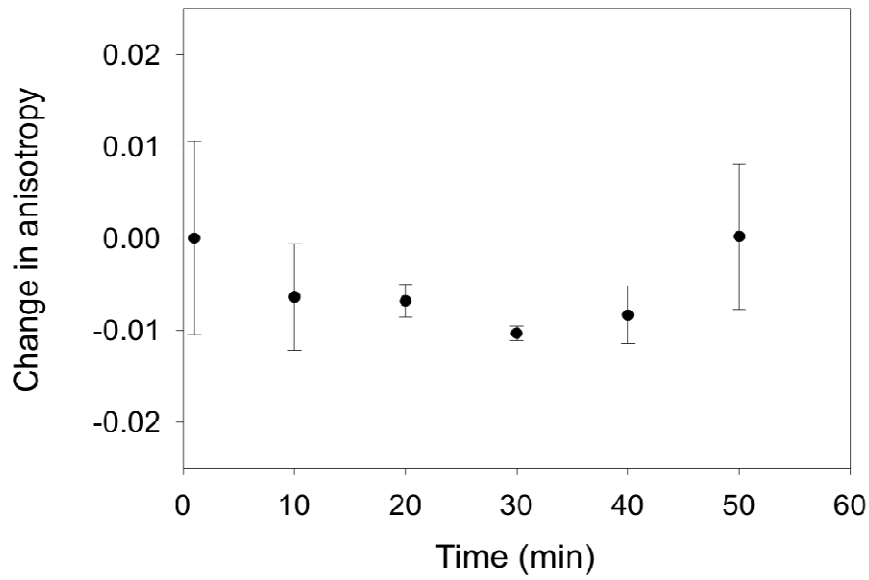

Supplemental Figure 3. The NmFNR-DNA complex from Figure 4 was aerated and the fluorescence anisotropy measured over the period of an hour. No significant loss of anisotropy was observed.
